# Supplementary material
Source: PubMed Central journal article supplement (PMC6005021)
Supplement: dyx209_ije-2017-04-0487-file002.pdf [file dyx209_ije-2017-04-0487-file002.pdf]

Supplement figures 1 -4:

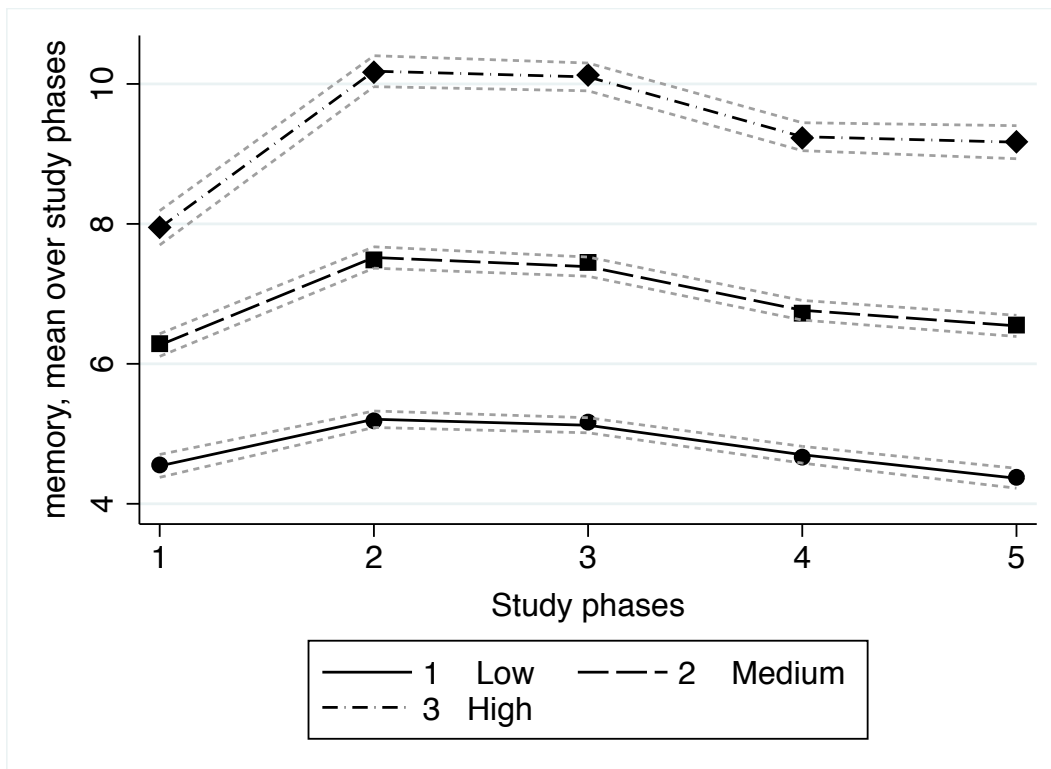

Figure 1S: Trajectories of memory test performance score over five study phases (from 1991/1994 to 2012/2013 (n=6072), BIC= 49289,76, AIC=49229.47).

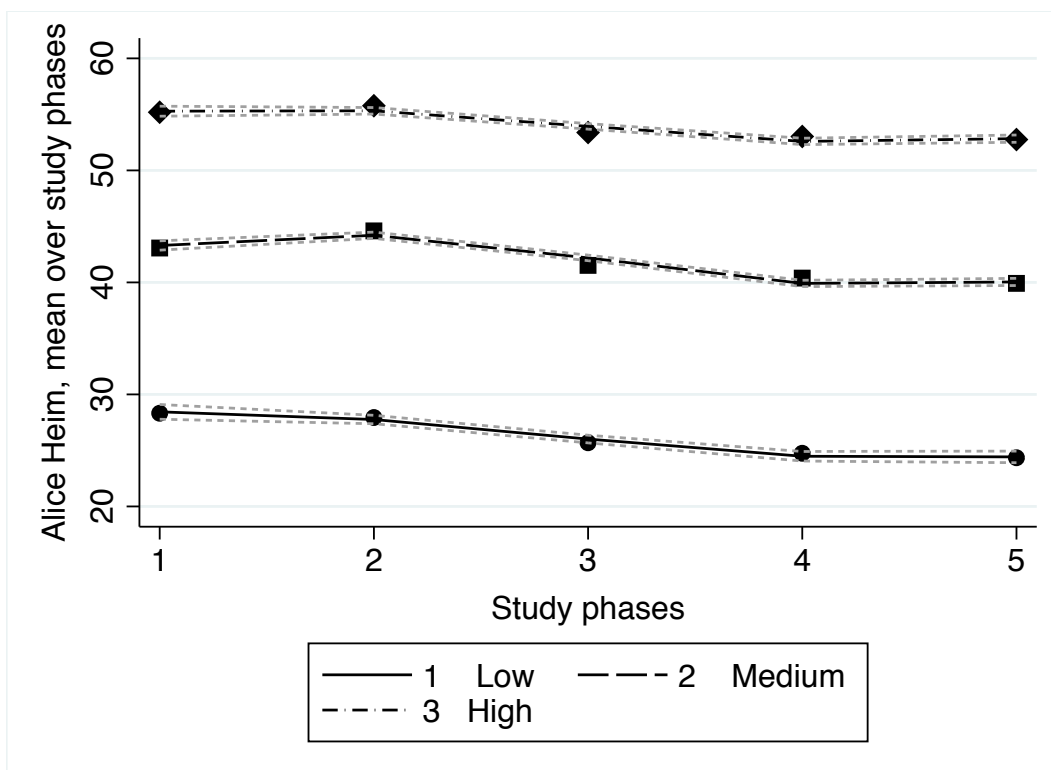

Figure 2S: Trajectories of inductive reasoning test performance score over five study phases (from 1991/1994 to 2012/2013 (n=6072) BIC= 78211.10, AIC=78150.75).

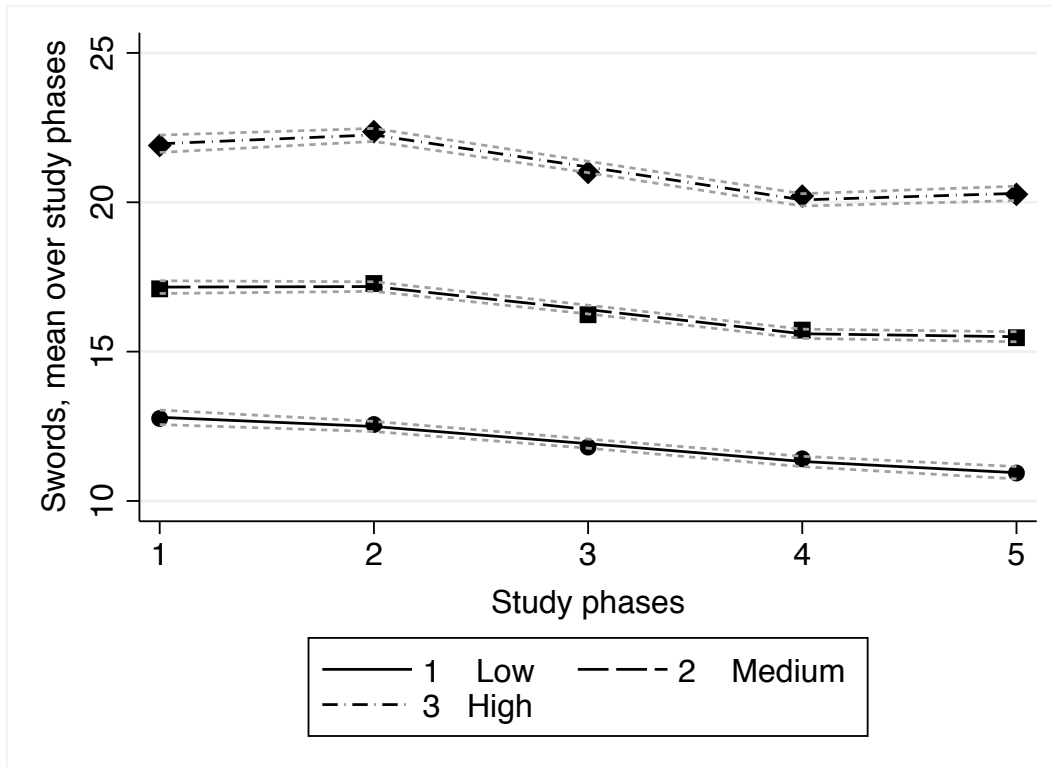

Figure 3S: Trajectories of phonemic fluency test performance score over five study phases (from 1991/1994 to 2012/2013 (n=6072) BIC=60709.70, AIC=6649.40).

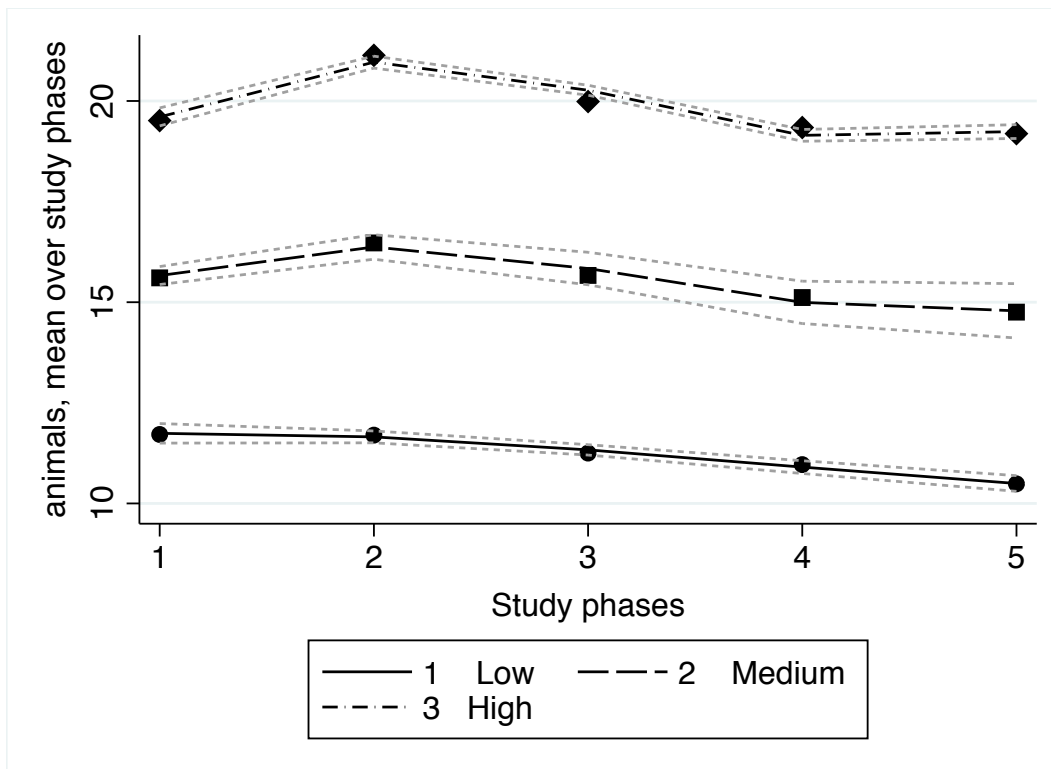

Figure 4S: Trajectories of semantic fluency test performance score over five study phases (from 1991/1994 to 2012/2013 (n=6072) BIC=59154.99, AIC=59094.67).
